# Supplementary material for: Amino acid repeats avert mRNA folding through conservative substitutions and synonymous codons, regardless of codon bias
Source: PubMed Central journal article supplement — Heliyon. 2017 Dec 28;3(12):e00492. doi: 10.1016/j.heliyon.2017.e00492 (PMC5772840; doi:10.1016/j.heliyon.2017.e00492), 2017-12-28
Supplement: mmc1.pdf [file mmc1.pdf]

**Supplementary Material 1**

Single amino acid repeats (SAARs) of selected GenBank entries are tabulated here.

The homopolymer location column indicates the residue number range of the SAAR.

General codon bias for the repeat amino acid in the human proteome and some relevant information are given in the last column.

| <i>Protein name and mRNA Accession No.;<br/>Human ONLY (but repeats are ubiquitous)</i>                                 | <i>Amino acid (number in run)</i>   | <i>Homopolymer<br/>location</i> | <i>Codon run pattern (runs of three or more are in Blue);<br/>number (highest to lowest);</i>                                                        | <i>Codon</i> | <i>Human genomewide codon bias (highest to<br/>lowest) for each amino acid, and comments</i>                                                       |
|-------------------------------------------------------------------------------------------------------------------------|-------------------------------------|---------------------------------|------------------------------------------------------------------------------------------------------------------------------------------------------|--------------|----------------------------------------------------------------------------------------------------------------------------------------------------|
| Fibrosin-1<br>NM_001105079.2                                                                                            | Ala (19)                            | 831-849                         | GCU1,GCC3,GCU1,GCC1,GCU3,GCC3,GCU1,GCC3,GCA2,GCC1;<br><b>GCC=11,GCU=6,GCA=2</b>                                                                      |              | Ala: GCC = 0.40, GCU = 0.27, GCA = 0.23, GCG = 0.11                                                                                                |
|                                                                                                                         | Glu (21) Discontinuous              | 107-135                         | GAG1,GAA1,GAG7,XXX6,GAA1,XXX,GAG3,CCU,GAG3,GAA,GAG4;<br><b>GAG=18,GAA=3</b>                                                                          |              | Glu: GAG = 0.58, GAA = 0.42                                                                                                                        |
|                                                                                                                         | Ser (6)                             | 54-59                           | UCC1,UCG1,UCC1,UCG3; <b>UCG=4,UCC=2</b>                                                                                                              |              | Ser:<br>AGC=0.24,UCC=0.22,UCU=0.19,UCA=0.15,AGU =0.15,UCG=0.05                                                                                     |
|                                                                                                                         | Ser (15) Discontinuous              | 371-386                         | UCA2,UCC1,UCU1,UCG1, <b>UCC4</b> ,UCA1,UCU1,GCC,UCC2,UCG1,UCC1<br>: <b>UCC=8,UCA=3,UCU=2,UCG=2</b>                                                   |              | In these two Ser runs, AGC/U is disfavored                                                                                                         |
| SKI/DACH domain-containing protein 1<br>SKIDA1; NM_207371.3                                                             | Ala (21)                            | 224-244                         | GCA1, <b>GCC8</b> ,GCU2, <b>GCC10</b> ; <b>GCC=18,GCU=2,GCA=1</b>                                                                                    |              |                                                                                                                                                    |
|                                                                                                                         | Ala (16)                            | 303-318                         | <b>GCG8</b> ,GCA1, <b>GCG4</b> ,GCC2,GCG1; <b>GCG=13,GCC=2,GCA=1</b>                                                                                 |              | Follows codon repeat, not codon bias, since GCG is lowest in bias.                                                                                 |
|                                                                                                                         | His (15)                            | 337-351                         | <b>CAC7</b> ,CAU1, <b>CAC7</b> ; <b>CAC=14,CAU=1</b>                                                                                                 |              | His: CAC = 0.58, CAU = 0.42<br>(GAA1,GAG4) may be a micro-repeat                                                                                   |
|                                                                                                                         | Glu (E) (16) Discontinuous          | 411-428                         | GAG1,GAA1, <b>GAG4</b> ,GGA, <b>GAG5</b> ,GAA1, <b>GAG4</b> ; <b>GAG=14,GAA=2</b>                                                                    |              |                                                                                                                                                    |
| Transcription factor SPT20 homolog-like 1; SPT20HL1<br>NM_001136234.1                                                   | Ala (55) Discontinuous (mostly Pro) | 495-565                         | GCU4,AUU,GCU18,GCU1,CCU,GCU1,CCU,GCU1,CUA,GCU5,CCU,G<br>CU1,CUA,GCU5,CCU, etc;<br><b>GCU=54,GCC=1</b>                                                |              | Ala: GCC = 0.40, GCU = 0.27, GCA = 0.23, GCG = 0.11<br>Again follows repeat, not human codon usage bias.                                           |
| Ribosomal protein S6 kinase, 90kDa, polypeptide 3<br>variant: AB208933.1                                                | Ala (22)                            | 17-38                           | <b>GCC3,GCU5</b> ,GCC1,GCU1,GCC1,GCU1, <b>GCC8</b> ,GCU1,GCC1;<br><b>GCC=14,GCU=8</b>                                                                |              | Although the overall usage appears to match bias (GCC>GCU).                                                                                        |
|                                                                                                                         | Gln (Q) (23)                        | 117-139                         | CAA1, <b>CAG3</b> ,CAA1, <b>CAG4</b> ,CAA1, <b>CAG6</b> ,CAA1, <b>CAG6</b><br><b>CAG=19,CAA=4</b>                                                    |              | Gln: CAG = 0.73, CAA = 0.27                                                                                                                        |
| Runt-related transcription factor 2 (RUNX2),<br>transcript variant X1<br>XM_011514960.2                                 | Ala (17)                            | 141-157                         | <b>GCG4</b> ,GCU1, <b>GCG5</b> ,GCU1, <b>GCG3</b> ,GCA1,GCU1,GCA1;<br><b>GCG=12,GCU=3,GCA=2</b>                                                      |              | Follows repeat, not bias; GCG is highest here, but has lowest bias.<br>GCC, with highest codon bias, is totally absent in the repeats.             |
|                                                                                                                         | Ala (17)                            | 419-435                         | GCA1,GCC1,GCU2,GCA1,GCU1,GCC1,GCG1,GCC1,GCU1,GCA1,GC<br>U1,GCA2,GCG1,GCC2;<br><b>GCC=5,GCU=5,GCA=5,GCG=2</b>                                         |              | Follows codon bias!! No run of 3 or more!!<br>Ala: GCC = 0.40, GCU = 0.27, GCA = 0.23, GCG = 0.11                                                  |
| Zinc finger protein 358 (ZNF358), NM_018083.4                                                                           | Ala (17)                            | 419-435                         | GCA1,GCC1,GCU2,GCA1,GCU1,GCC1,GCG1,GCC1,GCU1,GCA1,GC<br>U1,GCA2,GCG1,GCC2;<br><b>GCC=5,GCU=5,GCA=5,GCG=2</b>                                         |              | Follows codon bias!! No run of 3 or more!!<br>Ala: GCC = 0.40, GCU = 0.27, GCA = 0.23, GCG = 0.11                                                  |
| Homeodomain transcription factor NBPFOX,<br>NM_003924.3                                                                 | Ala (20)                            | 241-260                         | <b>GCA3,GCG3</b> ,GCC1,GCG1,GCA1, <b>GCG4</b> ,GCA1,GCG1,GCA1,GCG2,GC<br>A1,GCU1;<br><b>GCG=11,GCA=7,GCC=1,GCU=1</b>                                 |              | Ala: GCC = 0.40, GCU = 0.27, GCA = 0.23, GCG = 0.11<br>Repeat, not codon bias                                                                      |
| Homeobox A13, BC075791.1                                                                                                | Ala (18)                            | 116-133                         | GCU1,GCC2,GCU2,GCC1,GCG1,GCU1,GCC1,GCU1,GCA1, <b>GCC6</b> ,GC<br>G1;<br><b>GCC=10,GCU=5,GCG=2,GCA=1</b>                                              |              | Appears codon bias, not repeat, but there is a GCC6 micro-repeat.                                                                                  |
| POU domain, class 3, transcription factor 3<br>(POU3F3)<br>NM_006236.2                                                  | Gly (20) one Ala in the middle      | 30-50                           | <b>GCG3</b> ,GGG1,GGU1, <b>GGC6</b> ,GGG1,GCG2,GCA,GGG1,GGC1,GGG1, <b>GG<br/>C3</b> ;<br><b>GGC=15,GGG=4,GGU=1</b>                                   |              | Gly: GGC = 0.34, GGA = 0.25, GGG = 0.25, GGU = 0.16<br>Appears bias, not repeat.                                                                   |
|                                                                                                                         | Ala (16)                            | 189-194                         | GCG1,GCC2,GCU1,GCC1,GCA1,GCC1,GCA1, <b>GCC7</b> ,GCG1;<br><b>GCC=11,GCG=2,GCA=2,GCU=1</b>                                                            |              | Appears codon bias, not repeat.                                                                                                                    |
|                                                                                                                         | His (8)                             | 270-277                         | <b>CAC8</b>                                                                                                                                          |              | His: CAU = 0.42, CAC = 0.58<br>By repeat, not codon bias.                                                                                          |
| Ribosomal protein L14 (RPL14);<br>BC005134.2                                                                            | Ala (17)                            | 150-166                         | <b>GCU17</b>                                                                                                                                         |              | Clearly repeat, not codon bias.                                                                                                                    |
| FOXL2 (mutant 103 isolate); DQ016609.1                                                                                  | Ala (25)                            | 221-245                         | GCG1,GCA1,GCC1,GCA1,GCG1,GCU1,GCA2,GCU1,GCG1,GCU2,GC<br>A1,GCC1,GCA1,<br>GCG1,GCU1,GCA2,GCU1,GCG1,GCU1,GCA1,GCC1,GCG1;<br><b>GCA9,GCU7,GCG6,GCC3</b> |              | Like ZNF358; no run of 3 or more! However, not exactly bias either.<br>Ala: GCC = 0.40, GCU = 0.27, GCA = 0.23, GCG = 0.11                         |
| PH domain and leucine rich repeat protein<br>phosphatase 1 (PHLPP1); NM_194449.3                                        | Ala (20)                            | 26-45                           | GCG1,GCC2,GCU1,GCG1, <b>GCA5</b> ,GCG2,GCC1,GCG2,GCU1,CUG, <b>GC<br/>G3</b> ,GCC1;<br><b>GCG9,GCA5,GCC4,GCU2</b>                                     |              | Not much of a repeat (except GCA5), but also not fully bias;<br>e.g., GCG, the lowest in codon bias, is highest here.                              |
| Zinc finger SWIM-type containing 6 (ZSWIM6);<br>Arg1163Trp mutation in acromelic frontonasal<br>dysostosis; NM_020928.1 | Ala (16)                            | 169-184                         | <b>GCC4</b> ,GCU1, <b>GCC10</b> ,GCG1;<br><b>GCC=14,GCG=1,GCU=1</b>                                                                                  |              | Ala: GCC = 0.40, GCU = 0.27, GCA = 0.23, GCG = 0.11<br>Essentially codon bias, but medium and micro GCC repeats                                    |
| Aristaless-related homeobox protein, ARX;<br>NM_139058.2                                                                | Ala (16)                            | 100-115                         | GCG1,GCA1, <b>GCG10</b> ,GCA1,GCG1,GCC2;<br><b>GCG=12,GCC=2,GCA=2</b>                                                                                |              | Repeat of GCG, not bias.<br>Pattern: GCG repeat is often favored (not always) in Ala repeats, although GCG is of lowest bias in human codon usage. |
| Transcription factor SP9; NM_001145250.1                                                                                | Ala (16)                            | 455-470                         | GCG2,GCA1, <b>GCG4</b> ,GCA1, <b>GCG7</b> ,GCC1                                                                                                      |              | Ala: GCC = 0.40, GCU = 0.27, GCA = 0.23, GCG = 0.11                                                                                                |

|                                                                                                                  |                                  |                        |                                                                                                                                                                                                    |                           |                                                                                                                             |
|------------------------------------------------------------------------------------------------------------------|----------------------------------|------------------------|----------------------------------------------------------------------------------------------------------------------------------------------------------------------------------------------------|---------------------------|-----------------------------------------------------------------------------------------------------------------------------|
|                                                                                                                  |                                  |                        |                                                                                                                                                                                                    | <b>GCG=13,GCA=2,GCC=1</b> | Repeat of GCG, not bias. Extensive GCG usage seems common in Ala repeats.                                                   |
| Zinc-finger DNA binding protein (MAZ); U33819.1                                                                  | Ala (16), interrupted by one Val | 495-511                | GCG2,GCA1,GCG1,GCA1,GCC2,GCA1,GCG1,GCA2,GCG1,GCA2,GU<br>A,GCA1,GCC1;<br><b>GCG=7,GCA=8,GCC=1</b>                                                                                                   |                           | No codon run; again GCG is favored, GCC is least, reverse of bias.                                                          |
| NK2 homeobox 3 (NKX2-3);<br>NM_145285.2                                                                          | Ala (16)                         | 271-286                | GCC1,GCG1, <b>GCC9</b> ,GCA2,GCG2,GCC1;<br><b>GCC=11,GCG=3,GCA=2</b>                                                                                                                               |                           | Overall it is close to codon bias, but has a single run of GCC9.                                                            |
| GS homeobox 2; NM_133267.2                                                                                       | Ala (16)                         | 147-162                | GCC1, <b>GCG3,GCA4,GCG4</b> ,GCC1,GCG2,GCC1; <b>GCG=9,GCA=4,GCC3</b>                                                                                                                               |                           | Mixture of runs; GCG > GCC, unlike codon bias                                                                               |
| bHLH protein 3 (BHLHB3)<br>AY665466.1                                                                            | Ala (16)                         | 117-132                | GCG1,GCA1,GCC1,GCG1,GCA1, <b>GCC4</b> ,GCU1, <b>GCC5</b> ,GCG1;<br><b>GCC=10,GCG=3,GCA=2,GCU=1</b>                                                                                                 |                           | Ala: GCC = 0.40, GCU = 0.27, GCA = 0.23, GCG = 0.11<br>Like codon bias, because GCC is the most favored, which is rare.     |
| Solute carrier family 12, member 2 (SLC12A2)<br>NM_001046.2                                                      | Ala (15)                         | 93-107                 | GCC1,GCU2, <b>GCG7</b> ,GCA1, <b>GCG3</b> ,GCU1;<br><b>GCG=10,GCU=3,GCC=1,GCA=1</b>                                                                                                                |                           | GCG is highest, as in most cases, with runs.                                                                                |
| Serum amyloid A activating factor 2                                                                              | Ala (16)                         | 96-112, one Val inside | GCC1,GCG1,GCU2,GCG1,GCC1,GCU1,GCC2,GCU2,GCC2,GUC,GCU<br>1,GCC1,GCG1;<br><b>GCC=7,GCU=6,GCG=3</b>                                                                                                   |                           | No codon run, close to codon usage bias, though GCA is missing.                                                             |
| AlkB homolog 5, RNA demethylase (ALKBH5);<br>NM_017758.3                                                         | Ala (18), one Val inside         | 30-48                  | <b>GCC3</b> ,GCU1,GCC1,GCA1,GCC2,GUA,GCC2,GCA1,GCC1,GCA1,GCC<br>2,GCU1,GCC2;<br><b>GCC=13,GCU=2,GCA=3</b>                                                                                          |                           | Ala: GCC = 0.40, GCU = 0.27, GCA = 0.23, GCG = 0.11<br>Matches codon usage bias: rare example.                              |
| Engrailed homeobox 1 (EN1)                                                                                       | Ala (19), one Val inside         | 199-218                | GCU1, <b>GCG5</b> ,GCC1,GCG2,GCA1,GUA, <b>GCG5</b> ,GCC1,GCA2,GCC1;<br><b>GCG=12,GCC=3,GCA=3,GCU=1</b>                                                                                             |                           | More repeat than codon usage bias, as GCG is high with two runs.                                                            |
| <hr/>                                                                                                            |                                  |                        |                                                                                                                                                                                                    |                           |                                                                                                                             |
| Ataxin 2 (ATXN2); NM_002973.3                                                                                    | Gln (23)                         | 166-188                | CAG13,CAA1,CAG9; <b>CAG=22,CAA1</b>                                                                                                                                                                |                           | Gln: CAG = 0.73, CAA = 0.27 (Ratio ~3:1)<br>Two runs of CAG, with a single CAA codon in between                             |
| Ataxin 8 (ATXN8); DQ641254.1                                                                                     | Gln (59)                         | 2-60                   | <b>CAG59</b>                                                                                                                                                                                       |                           | This protein is all Gln, and the initiator Met; and all CAG, no CAA. Clearly repeat.                                        |
| Huntingtin A; L12392.1                                                                                           | Gln (21)                         | 18-38                  | CAG21,CAA1,CAG1; <b>CAG=22,CAA=1</b>                                                                                                                                                               |                           | Long run of CAG, with a single penultimate CAA                                                                              |
| Huntingtin, partial; EU797047.1                                                                                  | Gln (46)                         | 18-63                  | <b>CAG44</b> ,CAA1,CAG1; <b>CAG=45,CAA=1</b>                                                                                                                                                       |                           | Long run of CAG, with a single penultimate CAA                                                                              |
| TATA-box binding protein (TBP); NM_003194.4                                                                      | Gln (38)                         | 58-95                  | <b>CAG3,CAA3,CAG8</b> ,CAA1,CAG1,CAA1, <b>CAG19</b> ,CAA1,CAG1 (then<br>AVAAAAV, i.e. V inside A)<br><b>CAG=35,CAA=3</b>                                                                           |                           | CAG repeat overwhelms (12:1) codon usage bias (3:1); strong sign of repeat.                                                 |
| E1A binding protein p400 (EP400); NM_015409.4                                                                    | Gln (29)                         | 2056-2084              | <b>CAG27</b> ,CAA1,CAG1;<br><b>CAG=28,CAA=1</b>                                                                                                                                                    |                           | The most common pattern: CAG dominates, with a penultimate CAA                                                              |
| Thyroid hormone receptor-associated protein complex component TRAP230; AF117755.1                                | Repeat 1: Q (26)                 | 2086-2111              | <b>CAG5</b> ,CAA1,CAG2,CAA1,CAG1,CAA1, <b>CAG5</b> ,CAA1,CAG1,CAA1, <b>CAG7</b><br>; <b>CAG=21,CAA=5</b>                                                                                           |                           | CAG repeat (4:1), close to codon bias (3:1).                                                                                |
|                                                                                                                  | Repeat 2: Q (33); one His inside | 2125-2158              | <b>CAG3</b> ,CAA1,CAG1,CAA1, <b>CAG7</b> ,CAA1,CAG1,CAA1, <b>CAG4</b> ,CAA1,CAG1<br>,CAA2,CAG1,CAA1,CAC,CAG2,CAA1,CAG2,CAA1,CAG1;<br><b>CAG=23,CAA=8</b>                                           |                           | CAG repeat resembles codon bias (3:1).                                                                                      |
| Cancer-amplified transcriptional coactivator ASC-2 (ASC2); AF177388.1                                            | Q25                              | 261-285                | <b>CAG4,CAA4,CAG8</b> ,CAA2,CAG1,CAA1,CAG2,CAA2,CAG1;<br><b>CAG=16,CAA=9</b>                                                                                                                       |                           | CAG repeat resembles codon bias (3:1).                                                                                      |
| NCOA3 / AIB1; NM_181659.2                                                                                        | Q29                              | 1248-1276              | <b>CAG6</b> ,CAA1, <b>CAG9</b> ,CAA1,CAG1,CAA1,CAG1,CAA1,CAG1,CAA1,CAG2<br>,CAA1,CAG2,CAA1; <b>CAG=22,CAA=7</b>                                                                                    |                           | CAG repeat resembles codon bias (3:1).                                                                                      |
| Androgen receptor (AR); ADD26781.1                                                                               | Q23                              | 58-80                  | CAG22,CAA1                                                                                                                                                                                         |                           | 22 CAG in a row, then a single CAA (way above codon bias)                                                                   |
|                                                                                                                  | G23                              | 451-473                | GGU3,GGG1,GGU2,GGC17; <b>GGC=17,GGU=5,GGG=1</b>                                                                                                                                                    |                           | GGC bias is the highest and slightly > than GGA, but that does not explain 17 GGC in a row.                                 |
| FoxP2; BC143867.1                                                                                                | Q40                              | 152-191                | <b>CAG4</b> ,CAA1, <b>CAG4</b> ,CAA2,CAG2,CAA2, <b>CAG3</b> ,CAA5,CAG2,CAA2, <b>CAG5</b><br>,CAA1, <b>CAG5</b> ,CAA1,CAG1; <b>CAG=26,CAA=14</b>                                                    |                           | Codon bias                                                                                                                  |
| <hr/>                                                                                                            |                                  |                        |                                                                                                                                                                                                    |                           |                                                                                                                             |
| UDP-N-acetylglucosaminyltransferase subunit (ALG13); NM_001099922.2; Many isoforms (X1-X15) have similar repeats | P27                              | 919-945                | <b>CCA14,CCU13</b>                                                                                                                                                                                 |                           | Pro: CCC = 0.31, CCU = 0.29, CCA = 0.28, CCG = 0.11                                                                         |
| Piccolo presynaptic cytomatrix protein (PCLO); NM_033026.5                                                       | P22L1P3                          | 2405-2430              | CCU2,CCG1,CCU2,CCC1,GCU1,CCC1, <b>CCU5,CCA3</b> ,CCC1,CCU2,CCC<br>1,CCA2,CUU,CCU1,CCA2; <b>CCU=13,CCC=5,CCA=7</b>                                                                                  |                           |                                                                                                                             |
| Zinc finger homeobox 4 (ZFHX4); NM_024721.4                                                                      | P3T1P20                          | 2038-2061              | CCA2,CCC1,ACU,CCU1,CCC1, <b>CCA4,CCU7</b> ,CCC2,CCA1,CCU2,CCA1,<br>CCU1; <b>CCA=8,CCC=4,CCU=11</b>                                                                                                 |                           |                                                                                                                             |
| Formin like-2 (FMNL2); BC167159; Many isoforms (X1-X8) have similar repeats                                      | P2M1P21                          | 550-574                | CCA1,CCU1,AUG,CAA1, <b>CCG4</b> ,CCA1,CCC1,CCU2,CCA1, <b>CCU3</b> ,CCC1,<br>CCA1,CCG1,CCC1,CCU1,CCC1,CCU2; <b>CCA=5,CCU=9,CCG=5,CCC=4</b>                                                          |                           |                                                                                                                             |
| Zinc finger protein 341 (ZNF341); NM_001282933.1                                                                 | P10L1P6Q1P6                      | 178-201                | CCU1,CCA1,CCU3,CCA1,CCU2,CCA2,CUG,CCC1,CCA1,CCG1,CCA2,<br>CCU1,CAG,CCU1,CCA2,CCU1,CCA1,CCC1;<br><b>CCU=9,CCA=10,CCC=2,CCG=1</b>                                                                    |                           |                                                                                                                             |
| Preproacrosin; Y00970.1                                                                                          | P2A2Q1P1R1P3S1P8A1S1P1L1P9       | 330-370                | CCA1,CCG1,GCA,GCC,CAG,CCC1,CGA,CCC1,CCA1,CCU1,UCA,CC<br>C1,CCG1,CCC1,CCA1,CCC1,CCA1,CCU1,CCA1,GCC,UCA,CCU1,UU<br>A,CCC1,CCA1,CCC1,CCA1,CCC1,CCA1,CCC1,CCA1,CCU1;<br><b>CCA=9,CCC=9,CCG=2,CCU=4</b> |                           |                                                                                                                             |
| <hr/>                                                                                                            |                                  |                        |                                                                                                                                                                                                    |                           |                                                                                                                             |
| FMR1; M67468.1                                                                                                   | R20                              | 13-42                  | All <b>CGG</b>                                                                                                                                                                                     |                           | Arg: CGG=0.20, CGC=0.18, CGA=0.11, CGU=0.08; AGA=0.21, AGG=0.21<br>Repeat, since CGC, the close 2nd highest bias is absent. |
| SR-repetitive matrix protein 3; NM_001291831.1                                                                   | R11                              | 385-395                | AGG1, <b>CGG5</b> ,CGU1,AGG1,CGG2,CGC1;<br><b>CGG=7,AGG=2,CGC=1,CGU=1</b>                                                                                                                          |                           | Codon bias                                                                                                                  |
