# Supplementary material for: Amino acid repeats avert mRNA folding through conservative substitutions and synonymous codons, regardless of codon bias
Source: PubMed Central journal article supplement — Heliyon. 2017 Dec 28;3(12):e00492. doi: 10.1016/j.heliyon.2017.e00492 (PMC5772840; doi:10.1016/j.heliyon.2017.e00492), 2017-12-28
Supplement: mmc2.pdf [file mmc2.pdf]

## Supplementary Material 2

All double amino acid pair repeats (DAARs), in which the codons have the complementarity to form a hairpin, are surveyed here. The two pairing amino acids are listed in the first and second columns, and results are noted in the other columns.

|           |            | (aa1)5(aa2)5: Multiple searches found no repeat, so the search was abandoned. | (aa1aa2)5: For many of these dipeptides, short repeats, such as trimers, are found, but often separated by other amino acids and diverse repeats. Thus, they do not fold into a hairpin. |
|-----------|------------|-------------------------------------------------------------------------------|------------------------------------------------------------------------------------------------------------------------------------------------------------------------------------------|
| UUU (Phe) | AAA (Lys)  | No (Phe)5(Lys)5 string found                                                  | No (FK)5 found                                                                                                                                                                           |
|           | AAG (Lys)  | "                                                                             | No (FK)5 found                                                                                                                                                                           |
|           | AGG (Arg)  | No (Phe)5(Arg)5 string found                                                  | No (FR)5 found                                                                                                                                                                           |
|           | GGG (Gly)  | No (Phe)5(Gly)5 string found                                                  | No (FG)5 found                                                                                                                                                                           |
|           | GAG (Glu)  | No (Phe)5(Glu)5 string found                                                  | No (FE)5 found                                                                                                                                                                           |
| UUC (Phe) | GAA (Glu)  | "                                                                             | No (FE)5 found                                                                                                                                                                           |
|           | GAG (Glu)  | "                                                                             | No (FE)5 found                                                                                                                                                                           |
|           | GGG (Gly)  | No (Phe)5(Gly)5 string found                                                  | No (FG)5 found                                                                                                                                                                           |
|           | GGA (Gly)  | "                                                                             | No (FG)5 found                                                                                                                                                                           |
| UUA (Leu) | UAA (Stop) |                                                                               |                                                                                                                                                                                          |
|           | UAG (Stop) |                                                                               |                                                                                                                                                                                          |
|           | UGA (Stop) |                                                                               |                                                                                                                                                                                          |
|           | UGG (Trp)  | No (Leu)5(Trp)5 string found                                                  | No (LW)5 found                                                                                                                                                                           |
| UUG (Leu) | CAA (Gln)  | No (Leu)5(Gln)5 string found                                                  | No (LQ)5 found                                                                                                                                                                           |
|           | CAG (Gln)  | "                                                                             | No (LQ)5 found                                                                                                                                                                           |
|           | CGG (Arg)  | No (Leu)5(Arg)5 string found                                                  | No (LR)5 found                                                                                                                                                                           |
|           | CGA (Arg)  | "                                                                             | No (LR)5 found                                                                                                                                                                           |
| UCU (Ser) | AGA (Arg)  | No (Ser)5(Arg)5 string found                                                  | (SR) repeats use diverse codons, which prevents hairpin                                                                                                                                  |
|           | AGG (Arg)  | "                                                                             |                                                                                                                                                                                          |
|           | GGA (Gly)  |                                                                               | (SG) repeats use diverse codons, which prevents hairpin, e.g. X17042.1                                                                                                                   |
|           | GGG (Gly)  |                                                                               | "                                                                                                                                                                                        |
| UCC (Ser) | GGA (Gly)  |                                                                               | "                                                                                                                                                                                        |
|           | GGG (Gly)  |                                                                               | "                                                                                                                                                                                        |
| UCA (Ser) | UGA (Stop) |                                                                               |                                                                                                                                                                                          |
|           | UGG (Trp)  |                                                                               | No (SW)5 found                                                                                                                                                                           |
| UCG (Ser) | CGA (Arg)  |                                                                               | (SR) repeats use diverse codons, which prevents hairpin                                                                                                                                  |
|           | UGA (Stop) |                                                                               |                                                                                                                                                                                          |
|           | CGG (Arg)  |                                                                               | (SR) repeats use diverse codons, which prevents hairpin                                                                                                                                  |
|           | UGG (Trp)  |                                                                               | No (SW)5 found                                                                                                                                                                           |
| UAU (Tyr) | AUA (Ile)  |                                                                               | No (YI)5 found; see note for IY later                                                                                                                                                    |
|           | AUG (Met)  |                                                                               | No (YM)5 found                                                                                                                                                                           |
|           | GUA (Val)  |                                                                               | No (YV)5 found                                                                                                                                                                           |
|           | GUG (Val)  |                                                                               | No (YV)5 found                                                                                                                                                                           |
| UAC (Tyr) | GUA (Val)  |                                                                               | No (YV)5 found                                                                                                                                                                           |
|           | GUG (Val)  |                                                                               | No (YV)5 found                                                                                                                                                                           |
| UGU (Cys) | ACA (Thr)  |                                                                               | No (CT)5 found                                                                                                                                                                           |
|           | GCA (Ala)  |                                                                               | No (CA)5 found                                                                                                                                                                           |

|           |                                                                                |                                                                                                                                                                                                                                                                                     |
|-----------|--------------------------------------------------------------------------------|-------------------------------------------------------------------------------------------------------------------------------------------------------------------------------------------------------------------------------------------------------------------------------------|
|           | GCG (Ala)<br>AUA (Ile)                                                         | No (CA)5 found<br>No (CI)5 found; instead Ile is conservatively replaced with Val, to avoid base pairing: NP_001265373.1, ankyrin repeat LEM domain protein: 632 CVCVCVCVCVCVCLCVCVCV 651; See CV / VC later.                                                                       |
| UGC (Cys) | GCA (Ala)<br>GCG (Ala)<br>GUA (Val)<br>GUG (Val)                               | No (CA)5 found<br>No (CA)5 found<br>None.<br>In the NP_001265373.1 example above, Cys codons are UGU, so see later (VC repeats).                                                                                                                                                    |
| UGG (Trp) | CCA (Pro)<br><br>UCA (Ser)<br>UUA (Leu)<br>CUA (Leu)<br>CUG (Leu)<br>UCG (Trp) | No (WP)5 found. General finding on W repeat: Spaced, short W repeats are found in unusual proteins, e.g., alternate prion, keratin 9, and unnamed proteins.<br>No (WS)5 found<br>No (WL)5 found<br><br>No (WW)5 found                                                               |
| CUU (Leu) | AAG (Lys)<br>AGG (Arg)<br>GGG (Gly)<br>GAG (Glu)                               | No (LK)5 found<br>No (LR)5 found<br>No (LG)5 found<br>No (LE)5 found                                                                                                                                                                                                                |
| CUC (Leu) | GAG (Glu)<br>GGG (Gly)                                                         | No (LE)5 found, as before<br>No (LG)5 found, as before                                                                                                                                                                                                                              |
| CUA (Leu) | UAG (Stop)<br>UGG (Trp)                                                        | No (LW)5 found; same as (WL)5                                                                                                                                                                                                                                                       |
| CUG (Leu) | CAG (Gln)<br>CGG (Arg)                                                         | No (LQ)5 found<br>No (LR)5 found                                                                                                                                                                                                                                                    |
| CCU (Pro) | AGG (Arg)<br><br>GGG (Gly)                                                     | No (PR)5 found; but short PX repeats occur.<br><br>Pro-Gly repeats are found: E3 Ubq ligase HUWE1, all isoforms, X1-13; such as X1 = XP_016884680.1; RNA-binding protein 27, many isoforms, such as X1 = XP_005268523.1. But see Word file describing avoidance of pairable codons. |
| CCC (Pro) | GGG (Gly)                                                                      | "                                                                                                                                                                                                                                                                                   |
| CCA (Pro) | UGG (Trp)                                                                      | No (PW)5 found; same as (WP)5                                                                                                                                                                                                                                                       |
| CCG (Pro) | CGG (Arg)<br>UGG (Trp)                                                         | No (PR)5 found, as before.<br>No (PW)5 found as (WP)5 not found before.                                                                                                                                                                                                             |
| CAU (His) | AUG (Met)<br><br>GUG (Val)                                                     | No (HM)5 found.<br>No (HV)5 found, but there is (HI)5 repeat, e.g. EAW68840.1. Nature chose a conservative replacement, because His codon does NOT pair with Ile codons!!                                                                                                           |
| CAC (His) | GUG (Val)                                                                      | See above.                                                                                                                                                                                                                                                                          |
| CAA (Gln) | UUG (Leu)                                                                      | No (LQ)5 found, as (QL)5 not found before.                                                                                                                                                                                                                                          |
| CAG (Gln) | CUG (Leu)<br>UUG (Leu)                                                         | "<br>"                                                                                                                                                                                                                                                                              |

|           |           |                                                                                                                                                                                                                                            |
|-----------|-----------|--------------------------------------------------------------------------------------------------------------------------------------------------------------------------------------------------------------------------------------------|
| CGU (Arg) | ACG (Thr) | No (RT)5 (same as TR) repeat was found, but it retrieved mixture of SRTRHR etc.                                                                                                                                                            |
|           | GCG (Ala) | Purest RA repeat is 89-RARARARARATRRARRAVQKRA-109 in NP_057691.1 (armadillo repeat X-linked protein), but the RA length is not long enough for hairpin. More interestingly, it used other (synonymous) codons for both R (e.g. AGN) and A. |
| CGC (Arg) | GCG (Ala) | See above                                                                                                                                                                                                                                  |
|           | GUG (Val) | None.                                                                                                                                                                                                                                      |
| CGA (Arg) | UCG (Ser) | See SR comment earlier.                                                                                                                                                                                                                    |
|           | UUG (Leu) | No (LR)5 found earlier.                                                                                                                                                                                                                    |
| CGG (Arg) | CCG (Pro) | No (PR)5 found earlier.                                                                                                                                                                                                                    |
| AUU (Ile) | AAU (Asn) | No (IN)5 found.                                                                                                                                                                                                                            |
|           | AGU (Ser) | No (IS)5 found.                                                                                                                                                                                                                            |
|           | GGU (Gly) | None. Instead GX repeats are found where X is diverse amino acids; example 525-GMGIGVGTGVDAGMGIGVGTG-545 in XP_016886049.1                                                                                                                 |
| AUC (Ile) | GAU (Asp) | No ID repeat found. A few have short IX repeat with diverse X.                                                                                                                                                                             |
|           | GGU (Gly) | No IG repeat found. A few have short IX or GX repeats with diverse X.                                                                                                                                                                      |
| AUA (Ile) | UAU (Tyr) | No IY repeat found. A few have short IX repeats with diverse X. Example in XP_016864375.1, putative protein: 109-IYIYIHTYIHICIYIMYFYIYVY -132                                                                                              |
|           | UGU (Cys) | See previous comment for CI repeat (CV found instead).                                                                                                                                                                                     |
| AUG (Met) | CAU (His) | HM not found before.                                                                                                                                                                                                                       |
|           | CGU (Arg) |                                                                                                                                                                                                                                            |
| ACU (Thr) | AGU (Ser) | No ST or TS repeat found.                                                                                                                                                                                                                  |
|           | GGU (Gly) | No GT or TG repeat found.                                                                                                                                                                                                                  |
| ACC (Thr) | GGU (Gly) | No GT or TG repeat found.                                                                                                                                                                                                                  |
| ACA (Thr) | UGU (Cys) | No (CT)5 found before.                                                                                                                                                                                                                     |
| ACG (Thr) | CGU (Arg) | No RT /TR found.                                                                                                                                                                                                                           |
|           | UGU (Cys) | No (CT)5 found before.                                                                                                                                                                                                                     |
| AAU (Asn) | AUU (Ile) | None.                                                                                                                                                                                                                                      |
|           | GUU (Val) | NV run not found; instead diverse aliphatic amino acid is found for X in NX runs; example BCL9L protein AAH33257.1 , 62 - NLNMNMNVNMNMNMLNV- 79. This was found to be a common strategy!                                                   |
| AAC (Asn) | GUU (Val) | See above.                                                                                                                                                                                                                                 |
| AAA (Lys) | UUU (Phe) | No FK repeat found before.                                                                                                                                                                                                                 |
| AAG (Lys) | CUU (Leu) | None.                                                                                                                                                                                                                                      |
|           | UUU (Phe) | No FK repeat found earlier.                                                                                                                                                                                                                |
| AGU (Ser) | ACU (Thr) | None.                                                                                                                                                                                                                                      |
|           | GCU (Ala) | None.                                                                                                                                                                                                                                      |

|           |           |                                                                                                                  |                                                                                                                                                                                                                                                                                                                                                                                         |
|-----------|-----------|------------------------------------------------------------------------------------------------------------------|-----------------------------------------------------------------------------------------------------------------------------------------------------------------------------------------------------------------------------------------------------------------------------------------------------------------------------------------------------------------------------------------|
| AGC (Ser) | GCU (Ala) | (S)n(A)n with large loop occurs, but they use Ser UCC codon and a mix of GCN for Ala; Example NKX6.1, AH007313.2 | None.                                                                                                                                                                                                                                                                                                                                                                                   |
|           | GUU (Val) |                                                                                                                  | None                                                                                                                                                                                                                                                                                                                                                                                    |
| AGA (Arg) | UCU (Ser) |                                                                                                                  | Previously found: (SR) repeats use diverse codons, which prevents hairpin                                                                                                                                                                                                                                                                                                               |
|           | UUU (Phe) |                                                                                                                  | No (FR)5 found previously.                                                                                                                                                                                                                                                                                                                                                              |
| AGG (Arg) | CCU (Pro) |                                                                                                                  | See PR repeat comment earlier.                                                                                                                                                                                                                                                                                                                                                          |
|           | UCU (Ser) |                                                                                                                  | See previous comments.                                                                                                                                                                                                                                                                                                                                                                  |
|           | UUU (Phe) |                                                                                                                  | No (FR)5 found earlier.                                                                                                                                                                                                                                                                                                                                                                 |
|           | CUU (Leu) |                                                                                                                  | No (LR)5 found earlier.                                                                                                                                                                                                                                                                                                                                                                 |
| GUU (Val) | AAC (Asn) |                                                                                                                  | See NV earlier.                                                                                                                                                                                                                                                                                                                                                                         |
|           | GGC (Gly) |                                                                                                                  | GV repeat, when found, uses GGU codon for Gly and GUG for Val, which do not pair; example: XM_017030560.1, fibroin heavy chain-like, which is full of all sorts of repeat.                                                                                                                                                                                                              |
|           | GAC (Asp) |                                                                                                                  | None.                                                                                                                                                                                                                                                                                                                                                                                   |
|           | AGC (Ser) |                                                                                                                  | None, as before.                                                                                                                                                                                                                                                                                                                                                                        |
|           | GGU (Gly) |                                                                                                                  | See GV repeat above.                                                                                                                                                                                                                                                                                                                                                                    |
|           | GAU (Asp) |                                                                                                                  | None.                                                                                                                                                                                                                                                                                                                                                                                   |
|           | AGU (Ser) |                                                                                                                  | None, as before.                                                                                                                                                                                                                                                                                                                                                                        |
|           | GUC (Val) |                                                                                                                  | GAC (Asp)                                                                                                                                                                                                                                                                                                                                                                               |
| GAU (Asp) |           | None, as before.                                                                                                 |                                                                                                                                                                                                                                                                                                                                                                                         |
| GGC (Gly) |           | See above.                                                                                                       |                                                                                                                                                                                                                                                                                                                                                                                         |
| GGU (Gly) |           | See above.                                                                                                       |                                                                                                                                                                                                                                                                                                                                                                                         |
| GUA (Val) | UAC (Tyr) |                                                                                                                  | None, as before.                                                                                                                                                                                                                                                                                                                                                                        |
|           | UGC (Cys) |                                                                                                                  | None, as before.                                                                                                                                                                                                                                                                                                                                                                        |
|           | UAU (Tyr) |                                                                                                                  | None, as before.                                                                                                                                                                                                                                                                                                                                                                        |
|           | UGU (Cys) |                                                                                                                  | None, as before.                                                                                                                                                                                                                                                                                                                                                                        |
| GUG (Val) | CAC (His) |                                                                                                                  | See earlier.                                                                                                                                                                                                                                                                                                                                                                            |
|           | UAC (Tyr) |                                                                                                                  | None, as before.                                                                                                                                                                                                                                                                                                                                                                        |
|           | CGC (Arg) |                                                                                                                  | None, as before.                                                                                                                                                                                                                                                                                                                                                                        |
|           | UGC (Cys) |                                                                                                                  | None, as before.                                                                                                                                                                                                                                                                                                                                                                        |
|           | CAU (His) |                                                                                                                  | See HV earlier.                                                                                                                                                                                                                                                                                                                                                                         |
|           | UAU (Tyr) |                                                                                                                  | No YV repeat found earlier.                                                                                                                                                                                                                                                                                                                                                             |
|           | CGU (Arg) |                                                                                                                  | No RV repeat found earlier.                                                                                                                                                                                                                                                                                                                                                             |
|           | UGU (Cys) |                                                                                                                  | Rare. Example NP_001265373.1 mentioned before. Has the right codon pair for hairpin. However, this hairpin is just before the translation stop codon. So, translation will stop anyway, and ribosome slowing down may actually help. Moreover, in a long GU / UG run, most G:U bonds do not actually form; so this hairpin is also unstable (only - 6 kcal by Mfold), and may not form. |
| GCU (Ala) | AGC (Ser) | No A5X5Y5 stretch contains hairpinable GCU and AGC/AGU                                                           | None; as with SA before.                                                                                                                                                                                                                                                                                                                                                                |
|           | AGU (Ser) |                                                                                                                  | As above.                                                                                                                                                                                                                                                                                                                                                                               |
|           | GGC (Gly) |                                                                                                                  | A few AG runs are found, some use GCU for Ala, but almost exclusively GGG for Gly, so hairpin cannot form.                                                                                                                                                                                                                                                                              |
|           | GGU (Gly) |                                                                                                                  | See above.                                                                                                                                                                                                                                                                                                                                                                              |
| GCC (Ala) | GGC (Gly) |                                                                                                                  | See above, Very few Ala codons in these repeats are GCC, they are mostly GCU                                                                                                                                                                                                                                                                                                            |
|           | GGU (Gly) |                                                                                                                  | See above.                                                                                                                                                                                                                                                                                                                                                                              |
| GCA (Ala) | UGC (Cys) |                                                                                                                  | No repeat found before.                                                                                                                                                                                                                                                                                                                                                                 |
